# Supplementary material for: Genome-wide characterization of PEBP family genes in nine Rosaceae tree species and their expression analysis in P. mume
Source: PubMed Central journal article supplement (PMC7901119; doi:10.1186/s12862-021-01762-4), 2021-02-23

Figure S1. Phylogenetic trees were constructed using three different algorithms. (a) NJ (neighbor-joining) tree, (b) ML (maximum likelihood) tree, (c) Bayes (Bayesian) tree. Genes were clustered into *FT*-like, *BFT*-like, *TFL*-like, *CEN*-like, and *MFT*-like subfamilies.

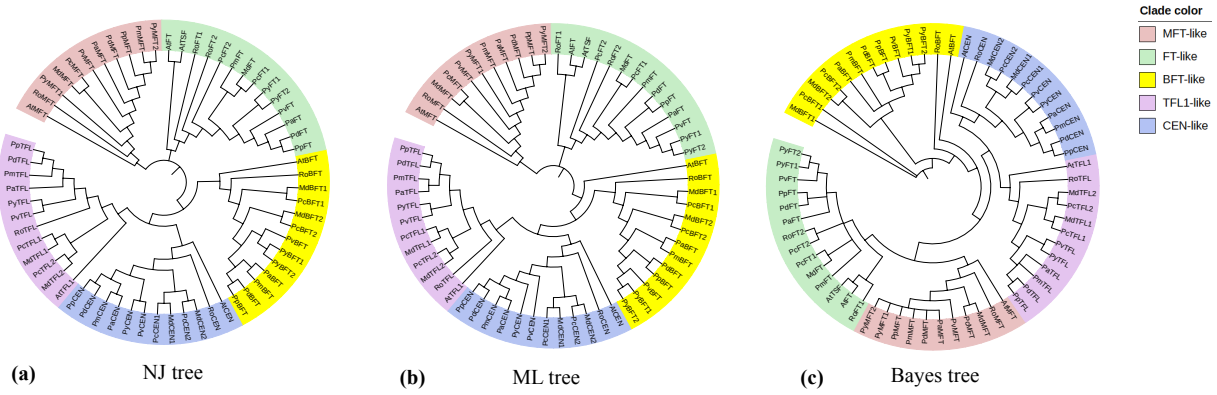

Supplement: 12862_2021_1762_MOESM1_ESM.pdf [file 12862_2021_1762_MOESM1_ESM.pdf]
