# Supplementary material for: Genome-wide characterization of PEBP family genes in nine Rosaceae tree species and their expression analysis in P. mume
Source: PubMed Central journal article supplement (PMC7901119; doi:10.1186/s12862-021-01762-4), 2021-02-23

Figure S2. Exon-intron distributions of *PEBP* family genes from nine *Rosaceae* species and *A. thaliana*.

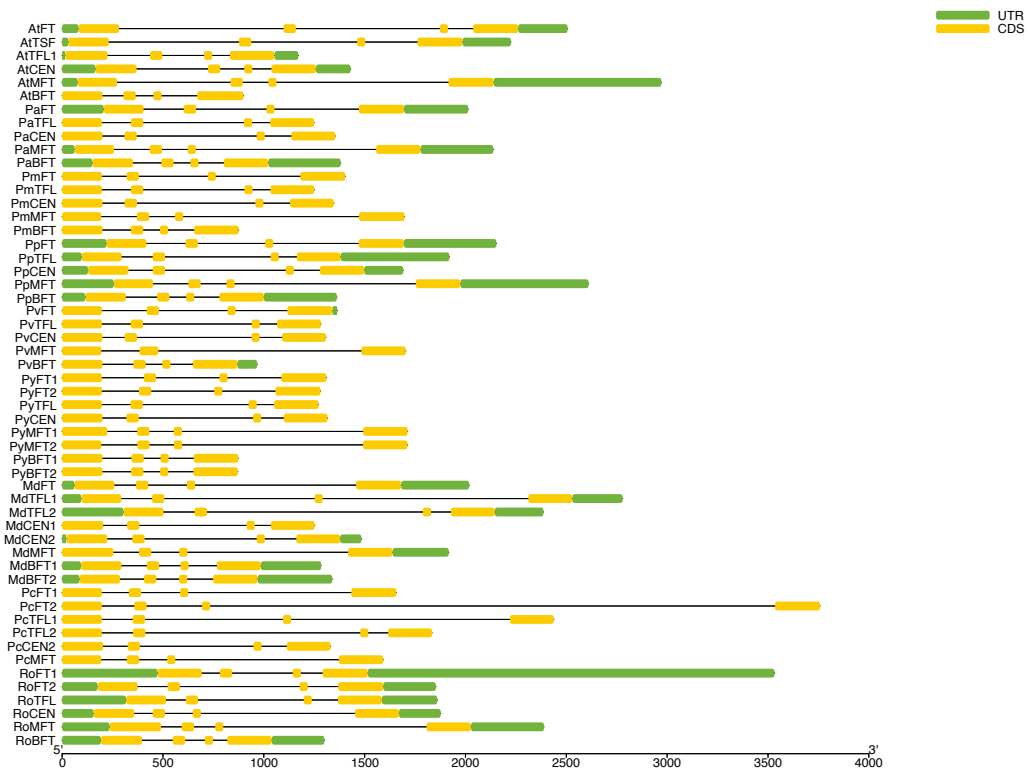

Supplement: 12862_2021_1762_MOESM2_ESM.pdf [file 12862_2021_1762_MOESM2_ESM.pdf]
