# Supplementary material for: Genome-wide characterization of PEBP family genes in nine Rosaceae tree species and their expression analysis in P. mume
Source: PubMed Central journal article supplement (PMC7901119; doi:10.1186/s12862-021-01762-4), 2021-02-23
Supplement: 12862_2021_1762_MOESM8_ESM.pdf [file 12862_2021_1762_MOESM8_ESM.pdf]

Figure S8. Selective pressure analysis of the *BFT*, *CEN*, and *MFT* lineages and *PEBP* genes as a whole identified strong purifying selection across protein sites. Amino acids colored with yellow/purple indicate sites of positive/purifying selection respectively.

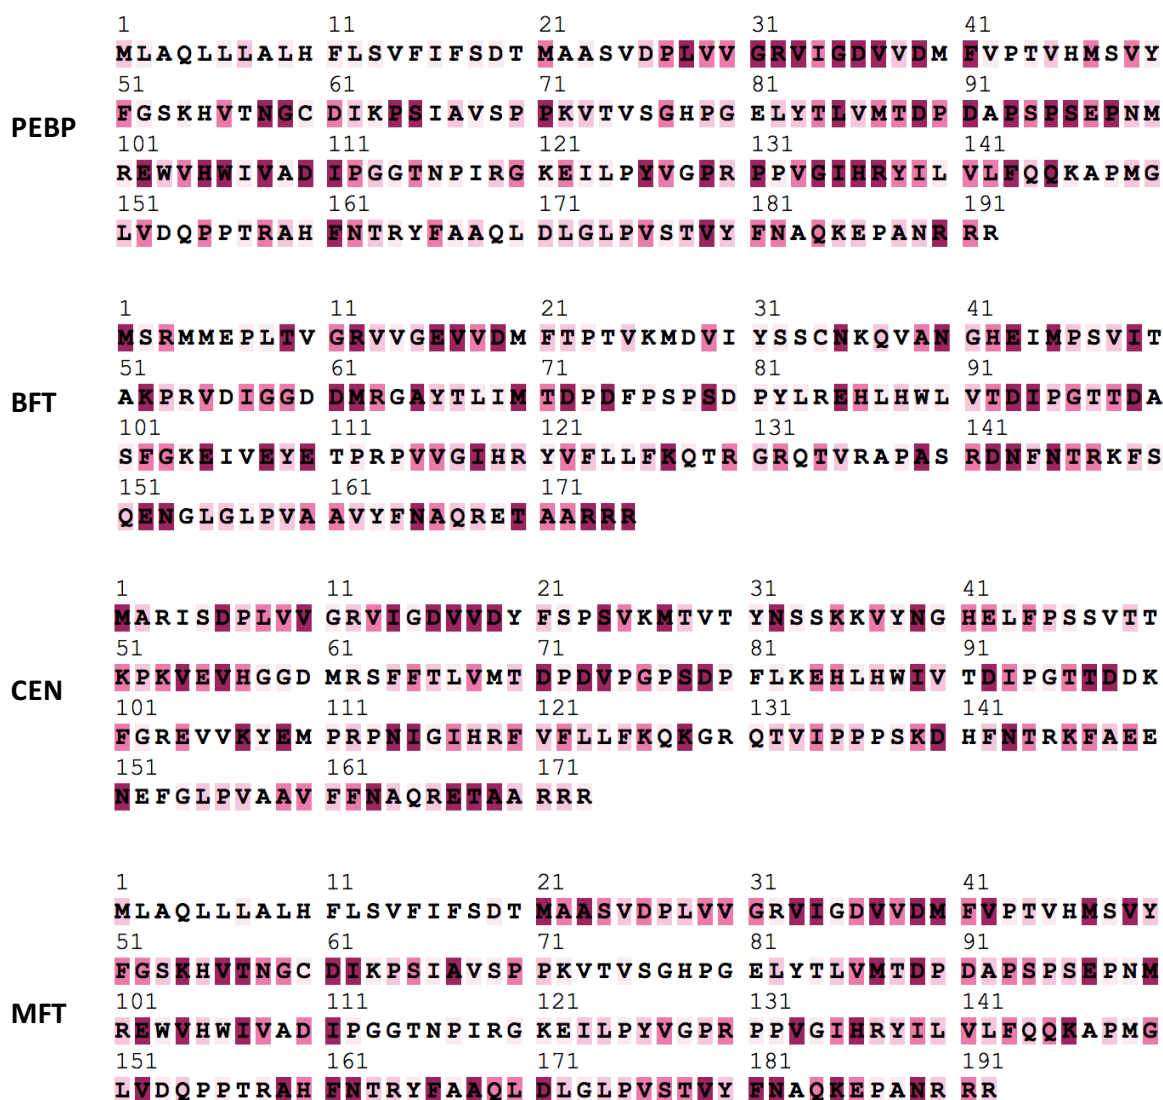

Legend:

The selection scale:

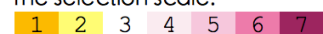

Positive selection      Purifying selection
