# Supplementary material for: Genome-wide characterization of PEBP family genes in nine Rosaceae tree species and their expression analysis in P. mume
Source: PubMed Central journal article supplement (PMC7901119; doi:10.1186/s12862-021-01762-4), 2021-02-23

Figure S10. Weighted gene co-expression network analysis (WGCNA) during four stages of floral bud blooming in *P. mume*. (a) Hierarchical clustering resulted in 23 modules of co-expressed genes. (b) Module-trait relationship heatmap presenting key modules strongly correlated with traits of interest.

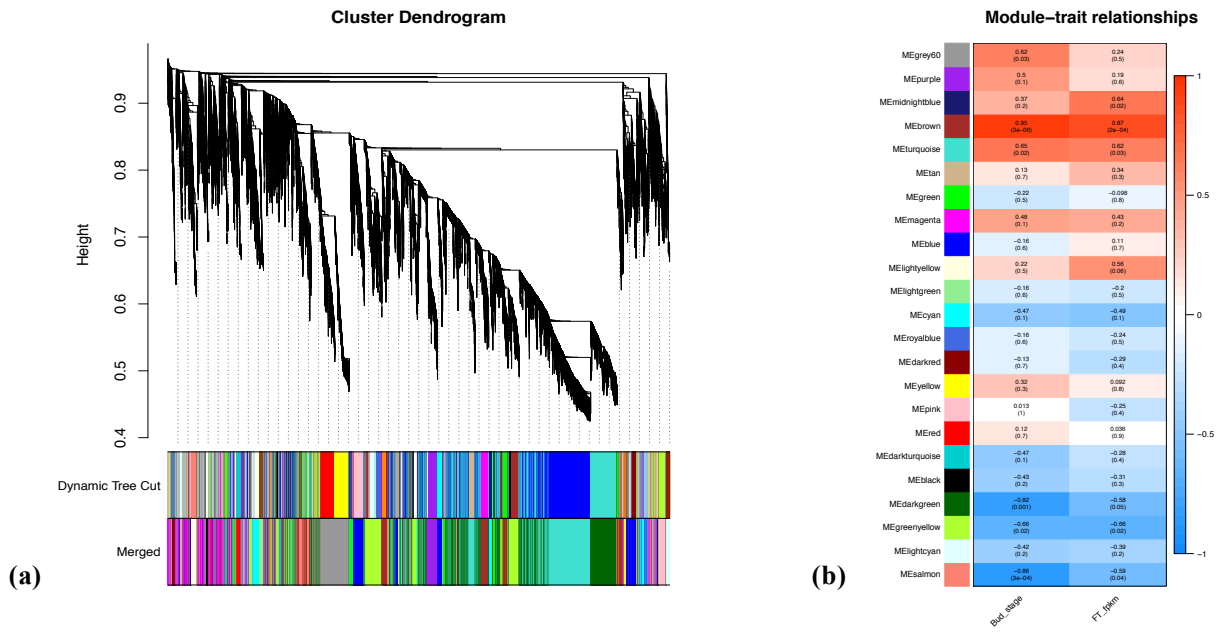

Supplement: 12862_2021_1762_MOESM10_ESM.pdf [file 12862_2021_1762_MOESM10_ESM.pdf]
