# Supplementary material for: Genome-wide characterization of PEBP family genes in nine Rosaceae tree species and their expression analysis in P. mume
Source: PubMed Central journal article supplement (PMC7901119; doi:10.1186/s12862-021-01762-4), 2021-02-23
Supplement: 12862_2021_1762_MOESM11_ESM.pdf [file 12862_2021_1762_MOESM11_ESM.pdf]

Table S1. Numbers of genes originated from different types of duplication events in the genomes of *Arabidopsis* and seven *Rosaceae* species.

| Species                     | No. genes of duplication origin |           |          |        |               |
|-----------------------------|---------------------------------|-----------|----------|--------|---------------|
|                             | Singleton                       | Dispersed | Proximal | Tandem | Segmental/WGD |
| <i>Arabidopsis thaliana</i> | 4246                            | 9035      | 1081     | 14204  | 6820          |
| <i>Malus domestica</i>      | 4478                            | 9898      | 3399     | 3391   | 23950         |
| <i>Rubus occidentalis</i>   | 7779                            | 16259     | 3019     | 2441   | 3788          |
| <i>Prunus armeniaca</i>     | 2561                            | 12297     | 4217     | 30232  | 2789          |
| <i>Prunus persica</i>       | 3812                            | 7880      | 2852     | 29439  | 3106          |
| <i>Prunus mume</i>          | 5237                            | 15565     | 2884     | 4546   | 3158          |
| <i>Prunus avium</i>         | 3138                            | 19047     | 1135     | 3713   | 3942          |
| <i>Prunus dulcis</i>        | 4548                            | 13535     | 1983     | 2989   | 3987          |
