# Supplementary material for: Genome-wide characterization of PEBP family genes in nine Rosaceae tree species and their expression analysis in P. mume
Source: PubMed Central journal article supplement (PMC7901119; doi:10.1186/s12862-021-01762-4), 2021-02-23
Supplement: 12862_2021_1762_MOESM12_ESM.pdf [file 12862_2021_1762_MOESM12_ESM.pdf]

Table S2. The duplication modes of *PEBP* genes in the genomes of *Arabidopsis* and seven *Rosaceae* species.

| Species                     | No. PEBP genes | Duplication origin                              |           |          |        |                                                                                                     |
|-----------------------------|----------------|-------------------------------------------------|-----------|----------|--------|-----------------------------------------------------------------------------------------------------|
|                             |                | Singleton                                       | Dispersed | Proximal | Tandem | Segmental/WGD                                                                                       |
| <i>Arabidopsis thaliana</i> | 6              | all                                             | 0         | 0        | 0      | 0                                                                                                   |
| <i>Malus domestica</i>      | 8              | <i>MdFT</i> ;<br><i>MdMFT</i>                   | 0         | 0        | 0      | <i>MdTFL1</i> ; <i>MdTFL2</i> ;<br><i>MdCEN1</i> ; <i>MdCEN2</i> ;<br><i>MdBFT1</i> ; <i>MdBFT2</i> |
| <i>Rubus occidentalis</i>   | 6              | all                                             | 0         | 0        | 0      | 0                                                                                                   |
| <i>Prunus armeniaca</i>     | 5              | all                                             | 0         | 0        | 0      | 0                                                                                                   |
| <i>Prunus persica</i>       | 5              | <i>PpFT</i> ;<br><i>PpMFT</i> ;<br><i>PpBFT</i> | 0         | 0        | 0      | <i>PpTFL</i> ; <i>PpCEN</i>                                                                         |
| <i>Prunus mume</i>          | 5              | <i>PmFT</i> ;<br><i>PmMFT</i> ;<br><i>PmBFT</i> | 0         | 0        | 0      | <i>PmTFL</i> ; <i>PmCEN</i>                                                                         |
| <i>Prunus avium</i>         | 5              | <i>PvFT</i> ; <i>PvMFT</i> ;<br><i>PvBFT</i>    | 0         | 0        | 0      | <i>PvTFL</i> ; <i>PvCEN</i>                                                                         |
| <i>Prunus dulcis</i>        | 5              | <i>PdFT</i> ;<br><i>PdMFT</i> ;<br><i>PdBFT</i> | 0         | 0        | 0      | <i>PdTFL</i> ; <i>PdCEN</i>                                                                         |
