# Supplementary material for: Genome-wide characterization of PEBP family genes in nine Rosaceae tree species and their expression analysis in P. mume
Source: PubMed Central journal article supplement (PMC7901119; doi:10.1186/s12862-021-01762-4), 2021-02-23
Supplement: 12862_2021_1762_MOESM13_ESM.pdf [file 12862_2021_1762_MOESM13_ESM.pdf]

Table S3. Pearson correlation between gene parameters estimated for 56 *Rosaceae* *PEBP* genes. Correlation coefficients with significant adjusted p-value <0.05 were shown in bold font. Positive correlation coefficients were colored in red and negative correlations colored in blue.

|          | Length | CAI          | totalGC%    | GC1%        | GC2%        | GC3%         | ENC          |
|----------|--------|--------------|-------------|-------------|-------------|--------------|--------------|
| Length   |        | -0.10        | 0.19        | 0.32        | -0.03       | 0.16         | 0.19         |
| CAI      | -0.10  |              | <b>0.56</b> | 0.09        | 0.16        | <b>0.72</b>  | <b>-0.62</b> |
| totalGC% | 0.19   | <b>0.56</b>  |             | <b>0.80</b> | <b>0.45</b> | <b>0.93</b>  | -0.34        |
| GC1%     | 0.32   | 0.09         | <b>0.80</b> |             | 0.17        | <b>0.67</b>  | 0.09         |
| GC2%     | -0.03  | 0.16         | <b>0.45</b> | 0.17        |             | 0.18         | -0.26        |
| GC3%     | 0.16   | <b>0.72</b>  | <b>0.93</b> | <b>0.67</b> | 0.18        |              | <b>-0.43</b> |
| ENC      | 0.19   | <b>-0.62</b> | -0.34       | 0.09        | -0.26       | <b>-0.43</b> |              |
