# Supplementary material for: Genome-wide characterization of PEBP family genes in nine Rosaceae tree species and their expression analysis in P. mume
Source: PubMed Central journal article supplement (PMC7901119; doi:10.1186/s12862-021-01762-4), 2021-02-23
Supplement: 12862_2021_1762_MOESM14_ESM.pdf [file 12862_2021_1762_MOESM14_ESM.pdf]

Table S4. Parameter estimates and likelihood values for branch models among *PEBP* lineages. Significant chi-square comparisons were indicated with \* (pLRT<0.05), \*\* (pLRT<0.01), \*\*\* (pLRT<0.001).

| Model Type | Branch Model | Fore-ground branch   | LnL          | Estimate of parameters                   | Model comparison   | pLRT           |
|------------|--------------|----------------------|--------------|------------------------------------------|--------------------|----------------|
| 0          | Fixed        | -                    | -4634.412778 | $\omega=1.15119$                         |                    |                |
| 1          | Free-Ratio   |                      | -4578.273183 | -                                        | Model 1 vs Model 0 | 0.370          |
| 2          | 1            | FT                   | -4634.024489 | $\omega_1=1.12589$<br>$\omega_2=1.65765$ | Model 2 vs Model 1 | 0.364          |
| 2          | 2            | TFL1                 | -4630.306725 | $\omega_1=1.10494$<br>$\omega_2=999.000$ | Model 2 vs Model 1 | 0.562          |
| 2          | 3            | CEN                  | -4634.056295 | $\omega_1=1.17099$<br>$\omega_2=0.78996$ | Model 2 vs Model 1 | 0.362          |
| 2          | 4            | BFT                  | -4634.306541 | $\omega_1=1.16330$<br>$\omega_2=0.91937$ | Model 2 vs Model 1 | 0.350          |
| 2          | 5            | (FT, BFT, TFL1, CEN) | -4634.316158 | $\omega_1=1.16488$<br>$\omega_2=0.99487$ | Model 2 vs Model 1 | P<0.001<br>*** |
