# Supplementary material for: Genome-wide characterization of PEBP family genes in nine Rosaceae tree species and their expression analysis in P. mume
Source: PubMed Central journal article supplement (PMC7901119; doi:10.1186/s12862-021-01762-4), 2021-02-23
Supplement: 12862_2021_1762_MOESM15_ESM.pdf [file 12862_2021_1762_MOESM15_ESM.pdf]

Table S5. Parameter estimates and likelihood values for site models across PEBP protein sites. Significant chi-square comparisons were indicated with \* (pLRT<0.05), \*\* (pLRT<0.01), \*\*\* (pLRT<0.001). Positive selected sites with its probability were detected with Bayes Empirical Bayes analysis.

| Nsite model          | LnL              | Estimate of parameters                                                                                                                                                                                                                            | pLRT                       | Selected sites                                                                                                 |
|----------------------|------------------|---------------------------------------------------------------------------------------------------------------------------------------------------------------------------------------------------------------------------------------------------|----------------------------|----------------------------------------------------------------------------------------------------------------|
| M0: one ratio        | -4634.412        | $\omega=1.15119$                                                                                                                                                                                                                                  |                            |                                                                                                                |
| M1: neutral          | -4593.888        | $p_1=0.23775, p_2=0.76225$<br>$\omega_1=0.14634, \omega_2=1.00000$                                                                                                                                                                                |                            |                                                                                                                |
| M2: selection        | -4575.12<br>***  | $p_1=0.19566, p_2=0.42586,$<br>$p_3=0.37847$<br>$\omega_1=0.14968, \omega_2=1.00000,$<br>$\omega_3=2.10351$                                                                                                                                       | 7.07E-09<br><br>(M1 vs M2) | 37,66,93,10<br>0,102,104,1<br>17,123                                                                           |
| M7: beta (neutral)   | -4595.246        | $p=0.10000, 0.10000, 0.10000,$<br>$0.10000, 0.10000, 0.10000,$<br>$0.10000, 0.10000, 0.10000,$<br>$0.10000$<br>$\omega= 0.00000, 0.21609,$<br>$0.99957, 1.00000, 1.00000,$<br>$1.00000, 1.00000, 1.00000,$<br>$1.00000, 1.00000$                  |                            |                                                                                                                |
| M8: beta (selection) | -4574.797<br>*** | $p=0.05577, 0.05577, 0.05577,$<br>$0.05577, 0.05577, 0.05577,$<br>$0.05577, 0.05577, 0.05577,$<br>$0.05577, 0.44227$<br>$\omega=0.01239, 0.11457, 0.29660,$<br>$0.50895, 0.70252, 0.84742,$<br>$0.93706, 0.98142, 0.99715,$<br>$0.99995, 1.97271$ | 1.32E-09<br><br>(M7 vs M8) | 13,19,21,34,<br>37,61,66,69,<br>73,76,83,89,<br>90,91,93,94,<br>96,100,102,<br>104,105,117<br>,121,122,12<br>3 |
