# Supplementary material for: Genome-wide characterization of PEBP family genes in nine Rosaceae tree species and their expression analysis in P. mume
Source: PubMed Central journal article supplement (PMC7901119; doi:10.1186/s12862-021-01762-4), 2021-02-23
Supplement: 12862_2021_1762_MOESM16_ESM.pdf [file 12862_2021_1762_MOESM16_ESM.pdf]

Table S6. Candidate genes co-expressed with *PmFT* during dormancy release in *P. mume*.

| ID       | Name     | Arabidopsis ortholog | Gene description                                                  |
|----------|----------|----------------------|-------------------------------------------------------------------|
| Pm000015 | Pm000015 | AT4G02620            | ATP synthase (F/14-kDa) subunit                                   |
| Pm000354 | Pm000354 | -                    | -                                                                 |
| Pm000576 | Pm000576 | AT2G29970            | SMXL7, SMAX1-LIKE 7                                               |
| Pm001840 | Pm001840 | AT2G21950            | SKIP6, SKP1 INTERACTING PARTNER 6                                 |
| Pm002166 | PmSVP    | AT2G22540            | SHORT VEGETATIVE PHASE, SVP                                       |
| Pm002433 | Pm002433 | AT2G23140            | PUB4, ubiquitin-protein ligase                                    |
| Pm003287 | Pm003287 | AT1G09020            | CBS domain containing membrane protein                            |
| Pm003731 | Pm003731 | AT5G36700            | Haloacid dehalogenase-like hydrolase                              |
| Pm004212 | Pm004212 | AT4G09900            | MES12, METHYL ESTERASE 12                                         |
| Pm004415 | PmDAM6   | -                    | DAM6, Dormancy-associated MADS-box transcription factor 6         |
| Pm004416 | PmDAM5   | -                    | DAM5, Dormancy-associated MADS-box transcription factor 5         |
| Pm004417 | PmDAM4   | -                    | DAM4, Dormancy-associated MADS-box transcription factor 4         |
| Pm004420 | PmDAM1   | -                    | DAM1, Dormancy-associated MADS-box transcription factor 1         |
| Pm004718 | Pm004718 | AT5G20240            | PI, PISTILLATA                                                    |
| Pm004871 | Pm004871 | -                    | -                                                                 |
| Pm005002 | Pm005002 | AT4G32530            | ATPase                                                            |
| Pm006700 | Pm006700 | AT1G60590            | Pectin lyase-like superfamily protein                             |
| Pm006712 | Pm006712 | AT1G60810            | ATP Citrate lyase                                                 |
| Pm007747 | Pm007747 | AT4G14040            | selenium-binding protein 2                                        |
| Pm008367 | Pm008367 | AT2G18790            | Phytochrome B                                                     |
| Pm008666 | Pm008666 | AT4G30310            | FGGY family of carbohydrate kinase                                |
| Pm008685 | Pm008685 | AT5G57630            | Protein kinase domain                                             |
| Pm008925 | Pm008925 | AT1G14650            | SWAP (Suppressor-of-White-APricot)/surp domain-containing protein |
| Pm010392 | Pm010392 | AT2G34470            | UREG, UREASE ACCESSORY PROTEIN G                                  |
| Pm012110 | Pm012110 | AT1G21200            | Myb/SANT-like DNA-binding domain                                  |
| Pm012952 | Pm012952 | AT2G31400            | pentatricopeptide-repeat protein                                  |
| Pm013633 |          | AT4G14770            | TESMIN/TSO1-like CXC 2                                            |
| Pm013793 | Pm013793 | AT1G80860            | defective in cullin neddylation protein (DUF298)                  |
| Pm014348 |          | AT5G37790            | Protein kinase domain                                             |
| Pm014730 | Pm014730 | AT1G48320            | Thioesterase superfamily protein                                  |
| Pm014767 | Pm014767 | AT2G30860            | GSTF9, GLUTATHIONE S-TRANSFERASE PHI                              |

|          |          |           |                                                          |
|----------|----------|-----------|----------------------------------------------------------|
| Pm015446 | PmCOL    | AT3G02380 | COL, CONSTANS-like 2                                     |
| Pm016910 | Pm016910 | AT2G26230 | UOX, URATE OXIDASE                                       |
| Pm017632 | Pm017632 | AT3G22320 | RNA polymerase Rpb5                                      |
| Pm018089 | PmSOC1   | AT2G45660 | SOC1                                                     |
| Pm018577 | Pm018577 | AT1G07930 | GTP binding Elongation factor Tu family protein          |
| Pm018676 | Pm018676 | AT2G39830 | LRD3, LATERAL ROOT DEVELOPMENT 3                         |
| Pm019359 | PmCEN    | AT2G27550 | CEN, Centroradialis                                      |
| Pm020062 | Pm020062 | AT2G40940 | ERS, ETHYLENE RESPONSE SENSOR                            |
| Pm020108 | Pm020108 | AT3G62580 | Late embryogenesis abundant protein (LEA) family protein |
| Pm021191 | Pm021191 | AT4G35220 | cyclase family protein                                   |
| Pm021763 | PmCIB1   | AT4G34530 | CIB1, CRYPTOCHROME-INTERACTING BASIC-HELIX-LOOP-HELIX 1  |
| Pm021986 | Pm021986 | AT5G64380 | Inositol monophosphatase family protein                  |
| Pm022471 | PmGI     | AT1G22770 | GI, GIGANTEA                                             |
| Pm023206 | Pm023206 | AT4G17910 | GPI-anchored wall transfer protein 1                     |
| Pm023520 | Pm023520 | AT1G62500 | Bifunctional inhibitor/lipid-transfer protein            |
| Pm023787 | Pm024079 | AT1G12780 | UDP-glucose 4-epimerase                                  |
| Pm024610 | PmLFY    | AT5G61850 | LFY, LEAFY                                               |
| Pm025571 | Pm025571 | AT4G24380 | Serine hydrolase (FSH1)                                  |
| Pm025831 | Pm025831 | AT3G57790 | Glycosyl hydrolases family 28                            |
| Pm026199 | Pm026199 | AT2G36310 | NSH1, NUCLEOSIDE HYDROLASE 1                             |
| Pm026270 | Pm026270 | AT5G03790 | homeobox associated leucine zipper                       |
| Pm027037 | Pm027037 | AT5G12080 | mechanosensitive channel of small conductance-like 10    |
| Pm027079 | Pm027079 | AT3G45310 | oryzain gamma chain precursor                            |
| Pm027498 | Pm027283 | AT4G29260 | HAD superfamily phosphatase                              |
| Pm028503 | Pm028503 | AT4G01410 | Late embryogenesis abundant protein                      |
| Pm028542 | Pm028542 | AT5G63000 | Mitochondrial import inner membrane translocase          |
| Pm028731 | PmLHY1   | AT1G01060 | LHY1, LATE ELONGATED HYPOCOTYL 1                         |
| Pm030191 | Pm030191 | AT1G73920 | alpha/beta-Hydrolases superfamily protein                |
| Pm030594 | PmAP1    | AT1G69120 | AP1, APETALA1                                            |
| Pm030895 | Pm030895 | AT1G73020 | alpha/beta-Hydrolases superfamily protein                |
