# Supplementary material for: Genome-wide characterization of PEBP family genes in nine Rosaceae tree species and their expression analysis in P. mume
Source: PubMed Central journal article supplement (PMC7901119; doi:10.1186/s12862-021-01762-4), 2021-02-23
Supplement: 12862_2021_1762_MOESM17_ESM.pdf [file 12862_2021_1762_MOESM17_ESM.pdf]

Table S7. Primers used for qRT-PCR analysis for *PEBP* family genes in *P. mume*.

| Gene         | Primer name | Sequence                |
|--------------|-------------|-------------------------|
| <i>PmBFT</i> | BFT-F       | GACAAGTTGCCAATGGACATG   |
|              | BFT-R       | CTCTCAAGTAAGGATCACTGGG  |
| <i>PmCEN</i> | CEN-F       | CTTCCTCACTAACCTCAAGC    |
|              | CEN-R       | TGTGGTATCAGTTGTGCCTG    |
| <i>PmFT</i>  | FT-F        | GCTCAAACCTTCCCAAGTTG    |
|              | FT-R1       | TGCTGGTATATCCGTAACCAACC |
| <i>PmMFT</i> | MFT-F       | GTCCAAGCATGTCACCAATG    |
|              | MFT-R       | TGTCAGCCACGATCCAATG     |
| <i>PmTFL</i> | TFL1-F      | CTGTCACCACCAAACCTAGAG   |
|              | TFL1-R      | TCACCACCTCTCTTCCAAATG   |
