# Supplementary material for: Genome-wide characterization of PEBP family genes in nine Rosaceae tree species and their expression analysis in P. mume
Source: PubMed Central journal article supplement (PMC7901119; doi:10.1186/s12862-021-01762-4), 2021-02-23
Supplement: 12862_2021_1762_MOESM18_ESM.pdf [file 12862_2021_1762_MOESM18_ESM.pdf]

Table S8. Primers used for qRT-PCR analysis of putative *FT* co-expressed genes in *P. mume*.

| Gene            | Primer name | Sequence                |
|-----------------|-------------|-------------------------|
| <i>PmPP2A</i>   | PP2A-F      | AGGGTTCGGCTCGCAATAATAGA |
|                 | PP2A-R      | TGTTAGCAGCAGCATCACGAAT  |
| <i>PmDAM1</i>   | DAM1-F      | AGTATGAAGGATGTTATTCAA   |
|                 | DAM1-R      | CTTAAGTTCCTTGCTCAATCT   |
| <i>PmDAM4</i>   | DAM4-F      | ACCCTTGTCGGTGTGATGGAA   |
|                 | DAM4-R      | ATCACCATCTGATTGTTGCCT   |
| <i>PmDAM5</i>   | DAM5-F      | AGGCTGAATAATAATATTGAA   |
|                 | DAM5-R      | TTAACGCCCCAGTTTGAGAGA   |
| <i>PmDAM6</i>   | DAM6-F      | AACCAACAACCAGTTAAGGCATA |
|                 | DAM6-R      | CAATTACGGCAGATTCAGATGA  |
| <i>Pm004212</i> | Pm004212-F  | ATTGTCTCAGAGGTTTGACGG   |
|                 | Pm004212-R  | CTCCAAACCCTTCTCCATGTAC  |
| <i>Pm004718</i> | Pm004718-F  | CAAGATTGAGATTAAGAGGATTG |
|                 | Pm004718-R  | AGAACAGTGATTTCCCTGGC    |
| <i>Pm008367</i> | Pm008367-F  | AGATAGTTTGGGTGATGCTGG   |
|                 | Pm008367-R  | TCTCTTTTGCAGTGTGGGATC   |
| <i>PmCOL</i>    | COL-F       | TCCACTCTGCCAATCCGTTG    |
|                 | COL-R       | AGCAGACCCCACCTCTATCC    |
| <i>PmSOC1</i>   | SOC1-F      | GTTCTTTGTGATGCTGAGGTTG  |
|                 | SOC1-R      | GCTGCATATTTTGGTCAGTGG   |
| <i>PmCIB1</i>   | CIB1-F      | GAAGAGGAAGGCTGATAAGGTG  |
|                 | CIB1-R      | GTTTGTGTTCTTGGTGCTGG    |
| <i>Pm025831</i> | Pm025831-F  | ATCCAATCTGCCATCGACAG    |
|                 | Pm025831-R  | TTGTTCTGCTCTTTCGGGTAG   |
| <i>Pm026270</i> | Pm026270-F  | CACCGGGTACACTGAAATCTC   |
|                 | Pm026270-R  | ACTCTTGCACCTGATGTTGG    |
| <i>PmAP1</i>    | AP1-F       | AGTACGCCACGGATTCATG     |
|                 | AP1-R       | CTTCTCCCAAATAGTGCCTCTG  |
